# Supplementary figures and images for: STAT3 regulates CD8+ T cell differentiation and functions in cancer and acute infection
Source: PubMed Central journal article supplement — J Exp Med. 2023 Jan 23;220(4):e20220686. doi: 10.1084/jem.20220686 (PMC9884582; doi:10.1084/jem.20220686), 2023-01-23

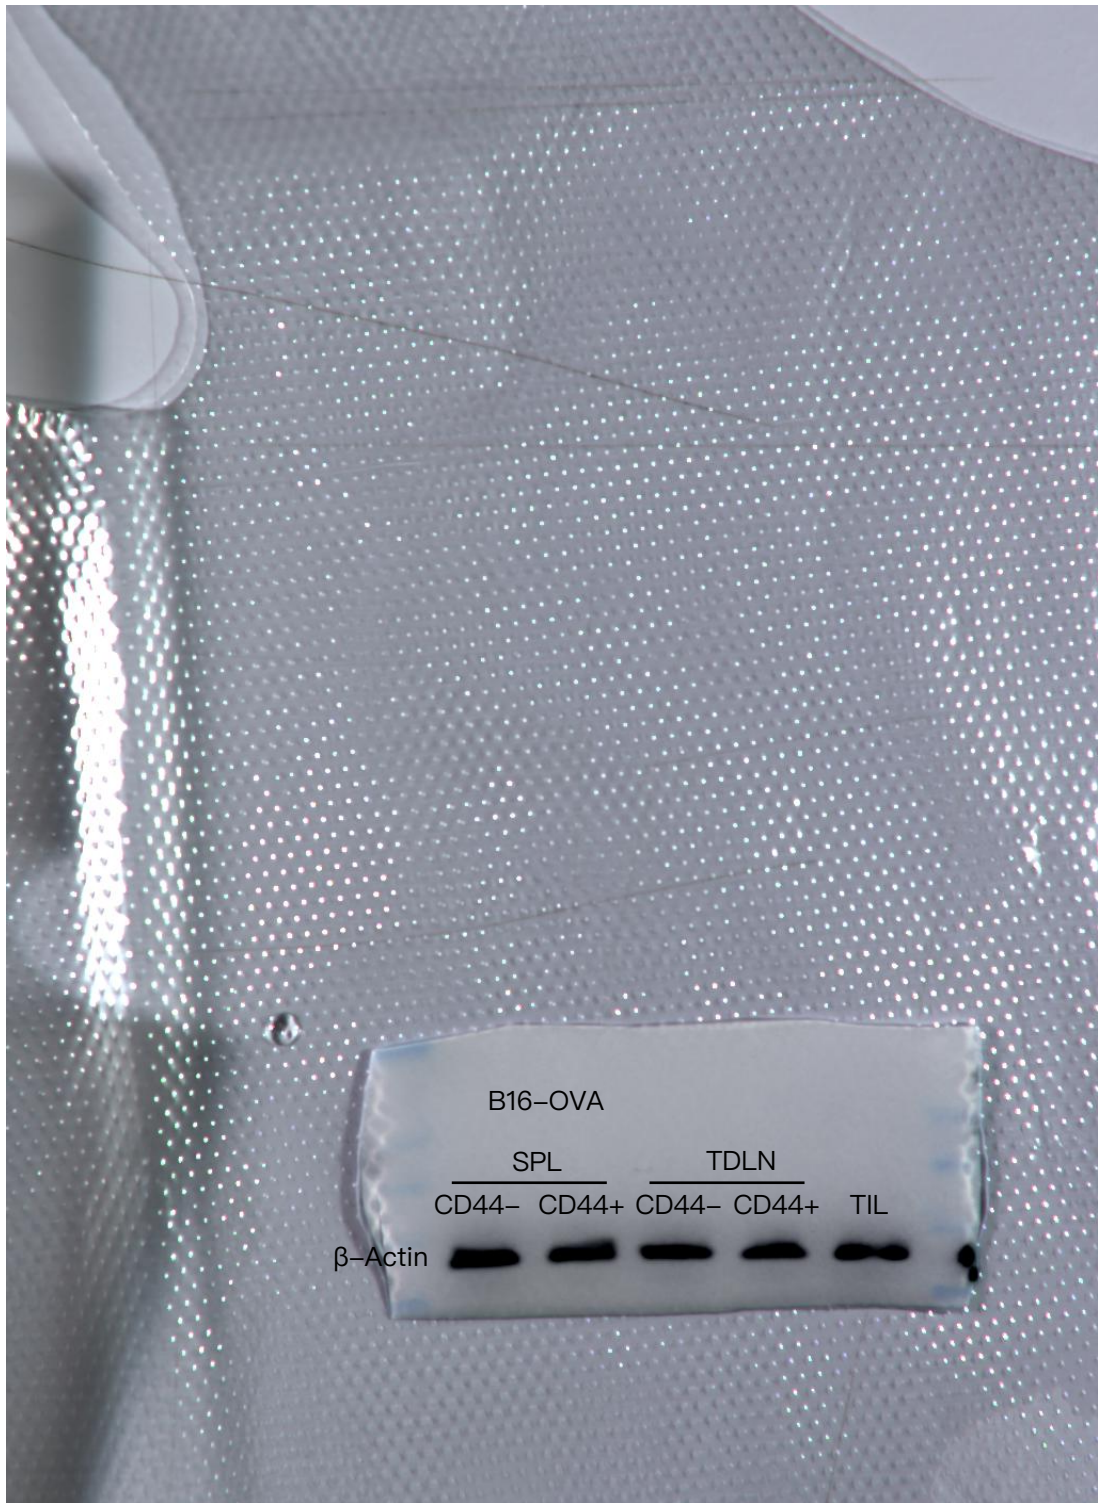

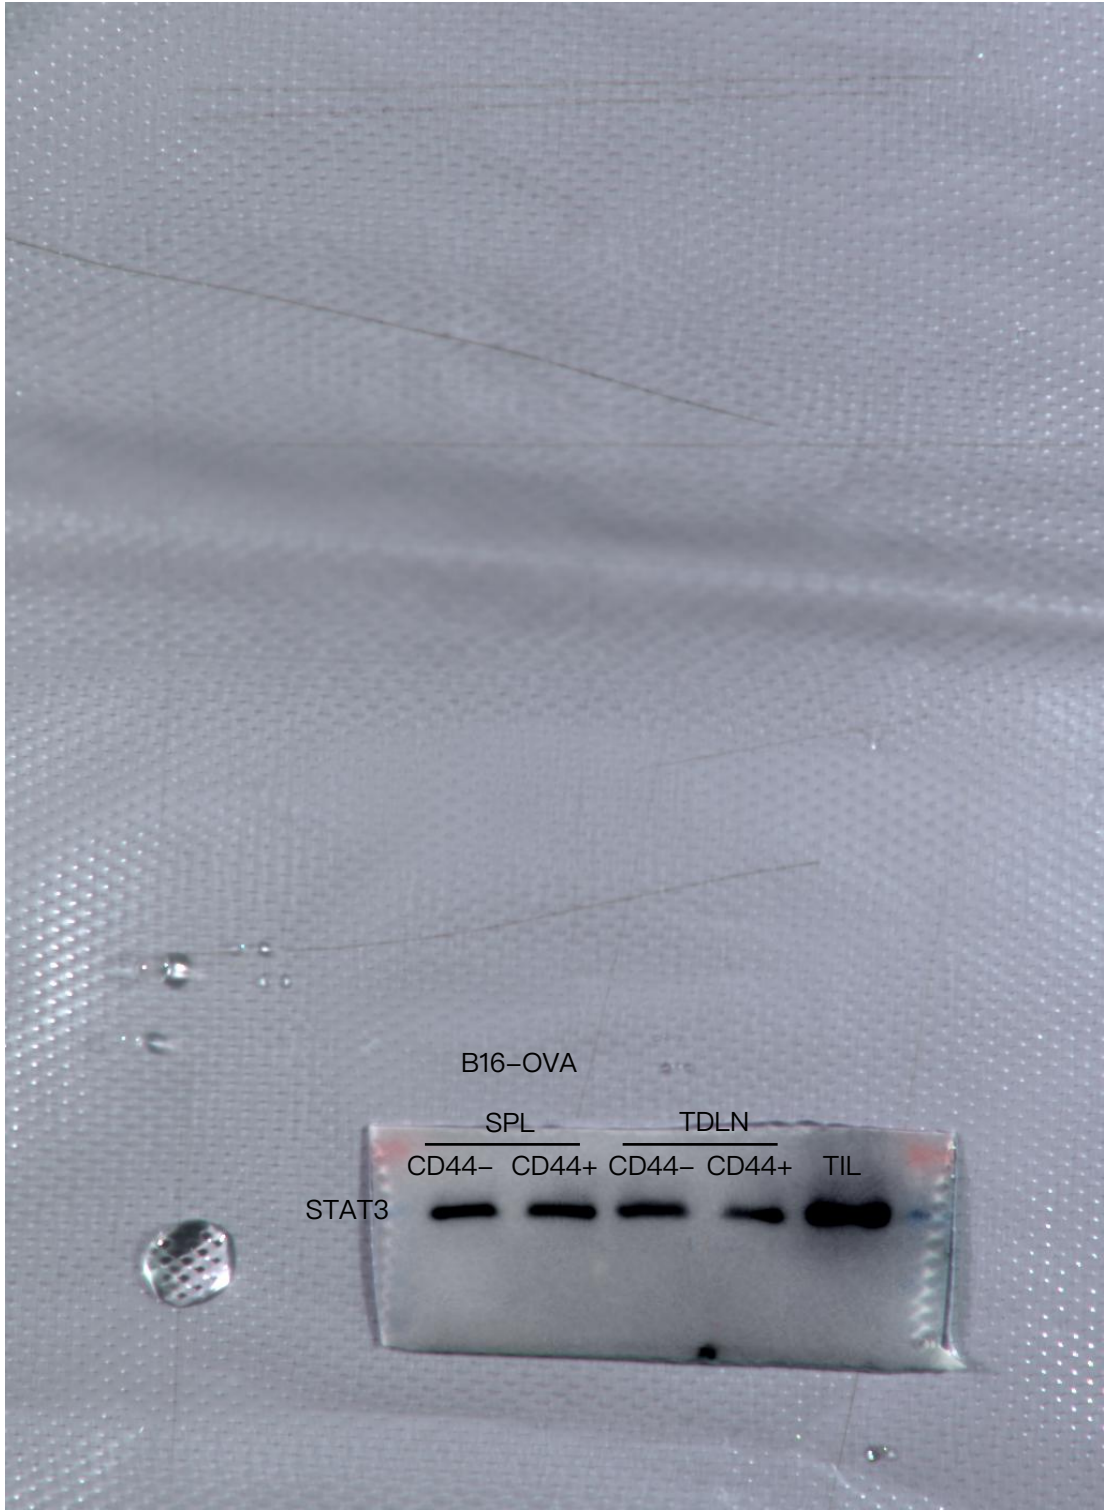

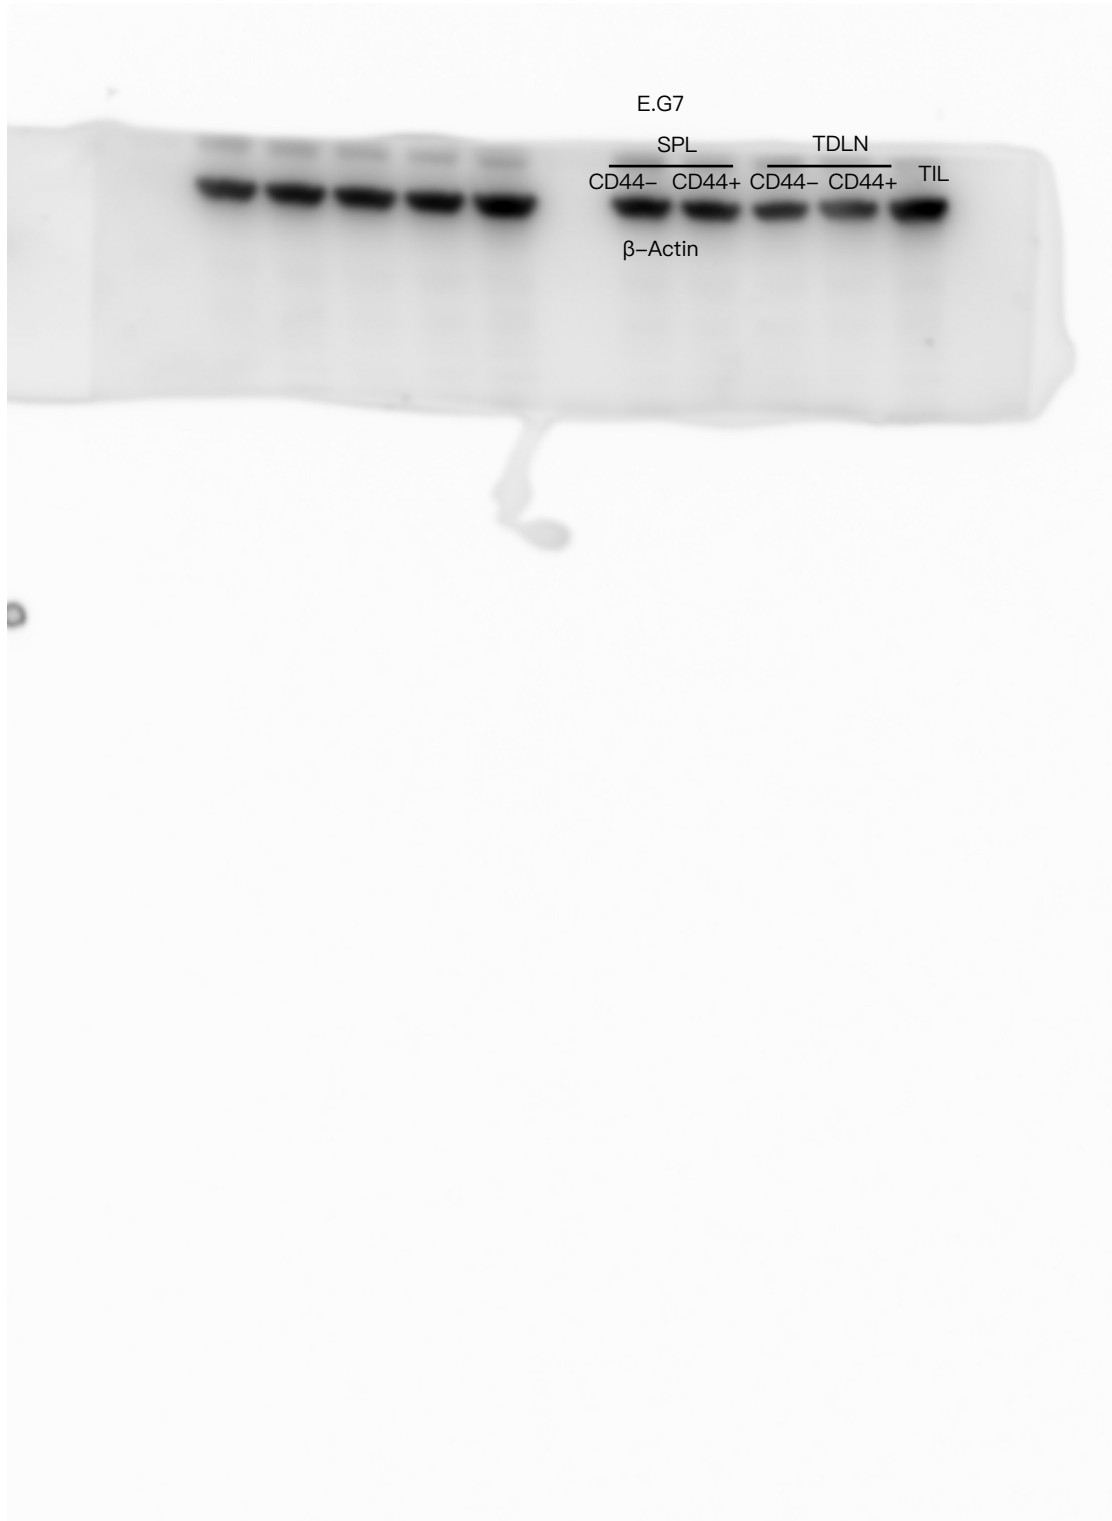

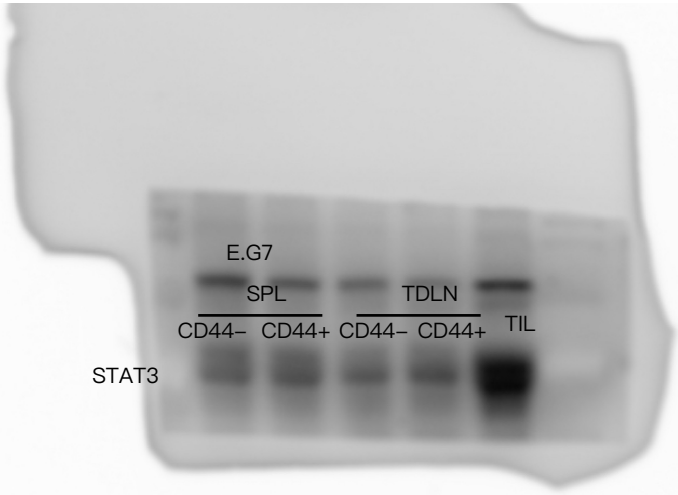

Supplement: JEM_20220686_SourceDataFS1.pdf [file JEM_20220686_SourceDataFS1.pdf]
